# Supplementary material for: Dual-source vapor-processed blue-emissive cesium copper iodine microplatelets with high crystallinity and stability
Source: Royal Society of Chemistry journal article supplement (doi:10.1039/d1tc03578a), 2021-01-01
Supplement: d1tc03578a1.pdf [file d1tc03578a1.pdf]

Supporting Information

## Dual-source vapor-processed blue-emissive cesium copper iodine microplatelets with high crystallinity and stability

Jing-Jing Yan, Jing-Li Ma, Meng-Yao Zhang, Ruo-Ting Yang, Xu Chen,\* Di Wu, Yong-Tao Tian,  
Xin-Jian Li and Zhi-Feng Shi\*

Key Laboratory of Materials Physics of Ministry of Education, School of Physics and  
Microelectronics, Zhengzhou University, Daxue Road 75, Zhengzhou 450052, China

---

\*Correspondence and requests for materials should be addressed to Z.S. (email: shizf@zzu.edu.cn) or to X.C. (email: xchen@zzu.edu.cn).

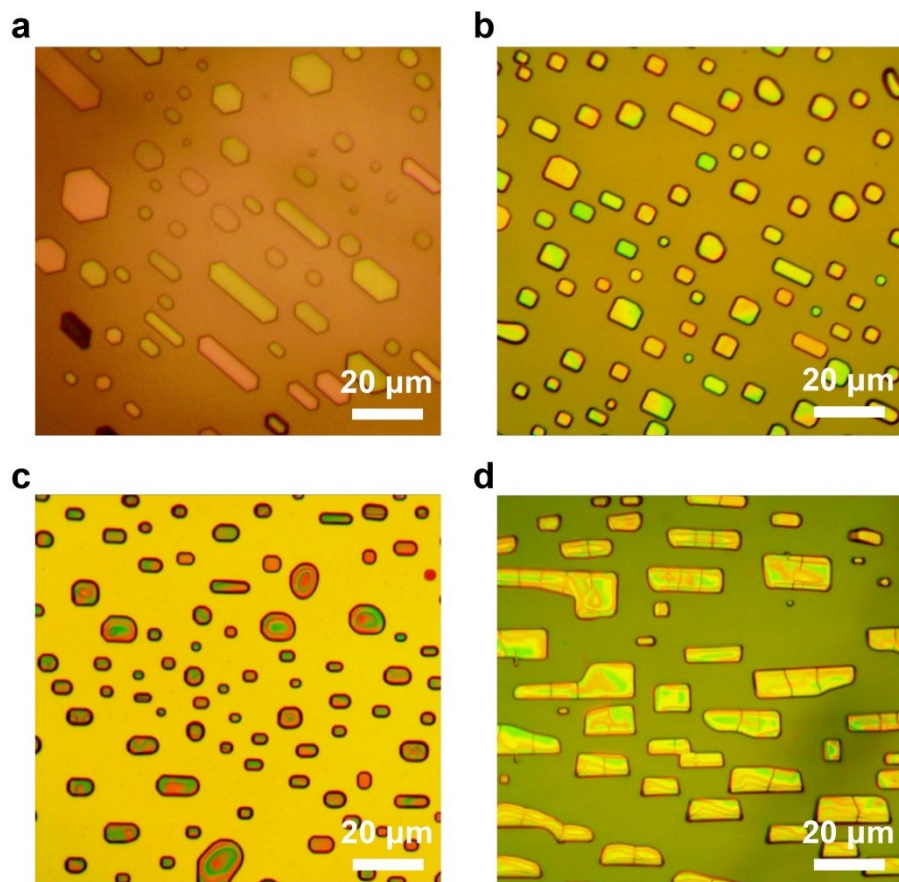

**Fig. S1.** Optical images of the Cs<sub>3</sub>Cu<sub>2</sub>I<sub>5</sub> microplatelets grown on (a) mica, (b) glass, (c) Si, and (d) SiO<sub>2</sub>/Si substrates, respectively.

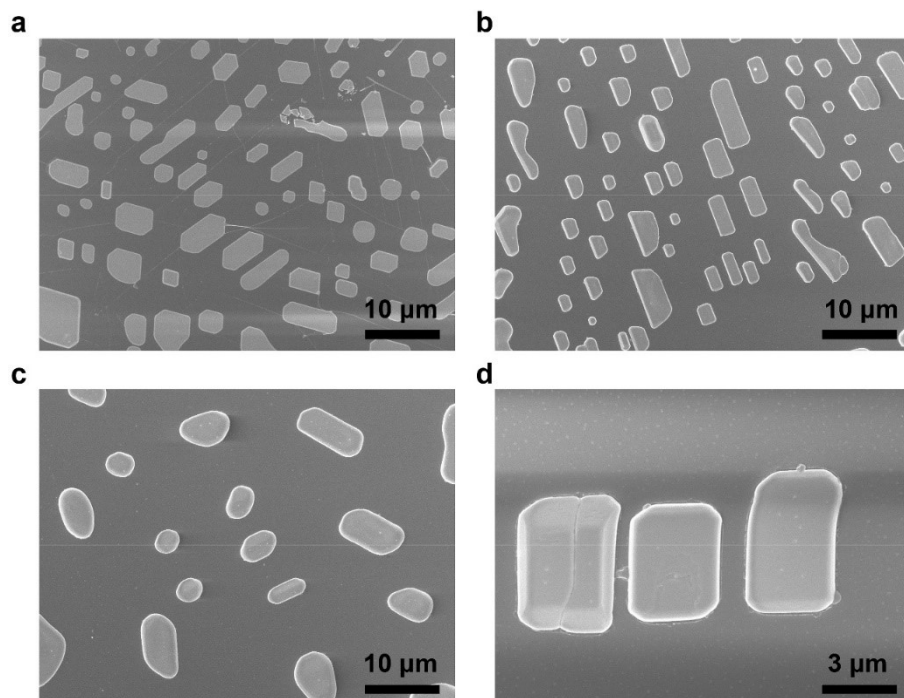

**Fig. S2.** SEM images of the  $\text{Cs}_3\text{Cu}_2\text{I}_5$  microplatelets grown on (a) mica, (b) glass, (c) Si, and (d)  $\text{SiO}_2/\text{Si}$  substrates, respectively.

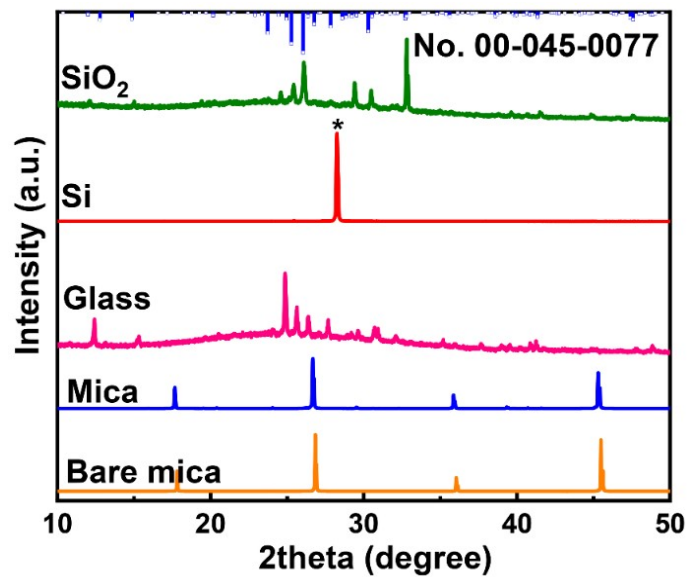

**Fig. S3.** XRD patterns of  $\text{Cs}_3\text{Cu}_2\text{I}_5$  microplatelets grown on mica, glass, Si (\* represents the diffraction peak of Si) and  $\text{SiO}_2/\text{Si}$  substrates.

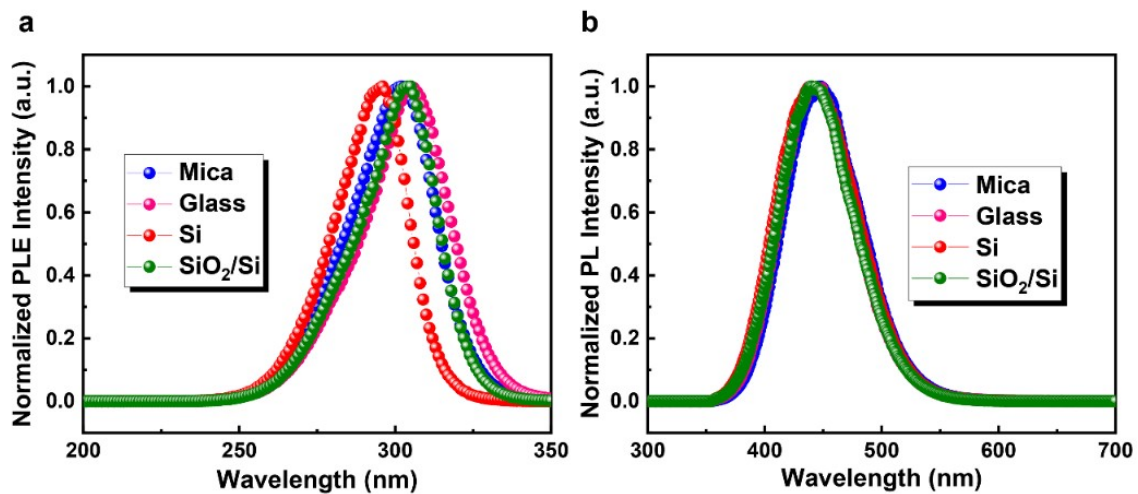

**Fig. S4.** (a) PL excitation spectra and (b) PL, of the  $\text{Cs}_3\text{Cu}_2\text{I}_5$  microplatelets grown on mica, glass, Si, and  $\text{SiO}_2/\text{Si}$  substrates, respectively.

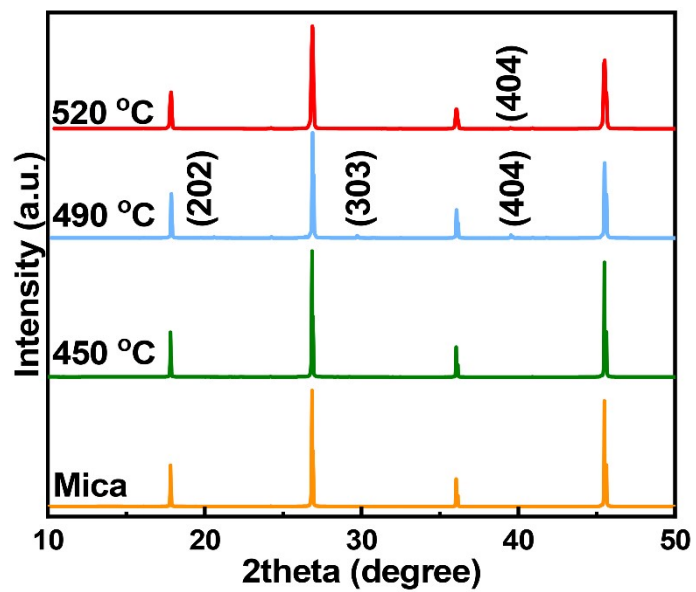

**Fig. S5.** XRD patterns of  $\text{Cs}_3\text{Cu}_2\text{I}_5$  microplatelets prepared at different growth temperatures.

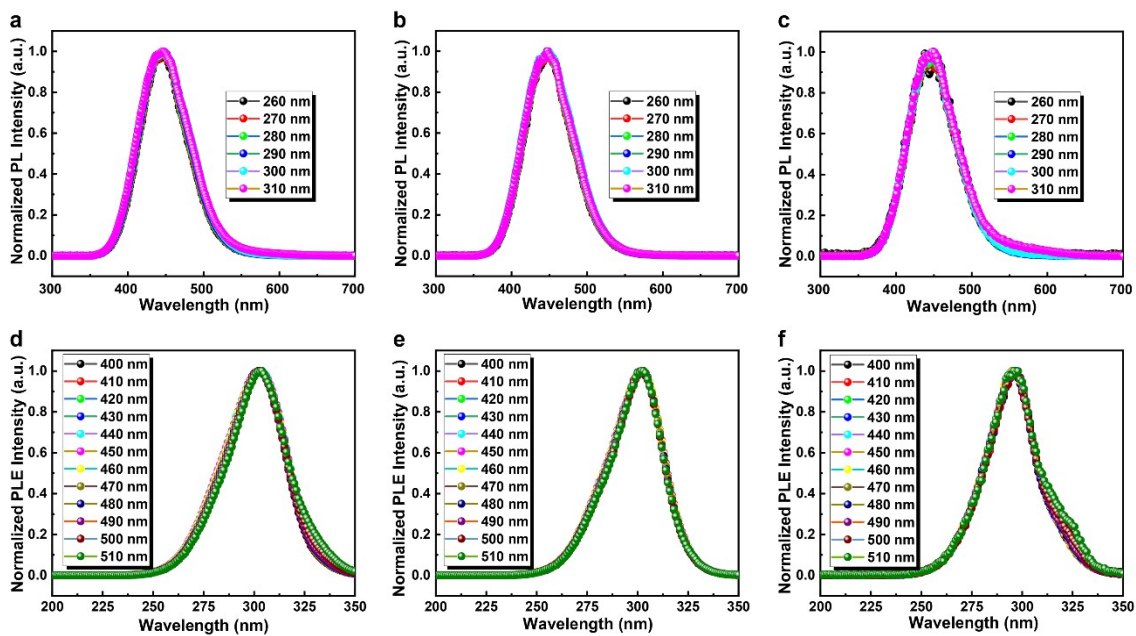

**Fig. S6.** PL spectra and PL excitation spectra of  $\text{Cs}_3\text{Cu}_2\text{I}_5$  microplatelets grown at different temperatures measured at different excitation and emission wavelengths, respectively. (a, d), 450 °C; (b, e) 490 °C; (c, f) 520 °C.

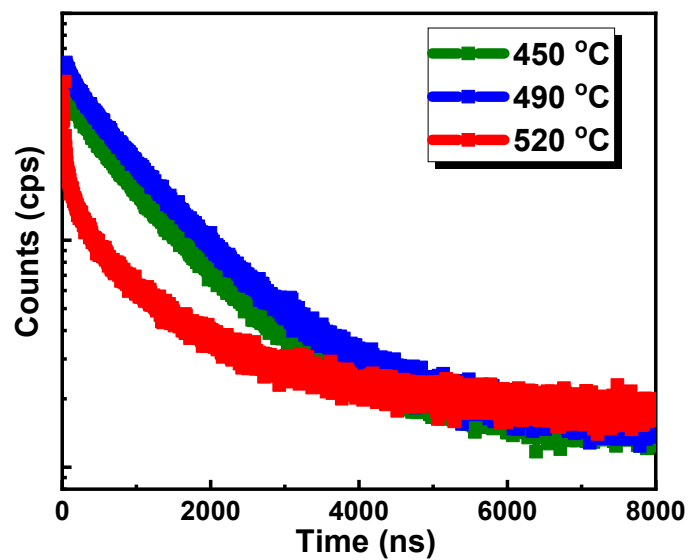

**Fig. S7.** PL decay curves of the Cs<sub>3</sub>Cu<sub>2</sub>I<sub>5</sub> microplatelets prepared at different growth temperatures.



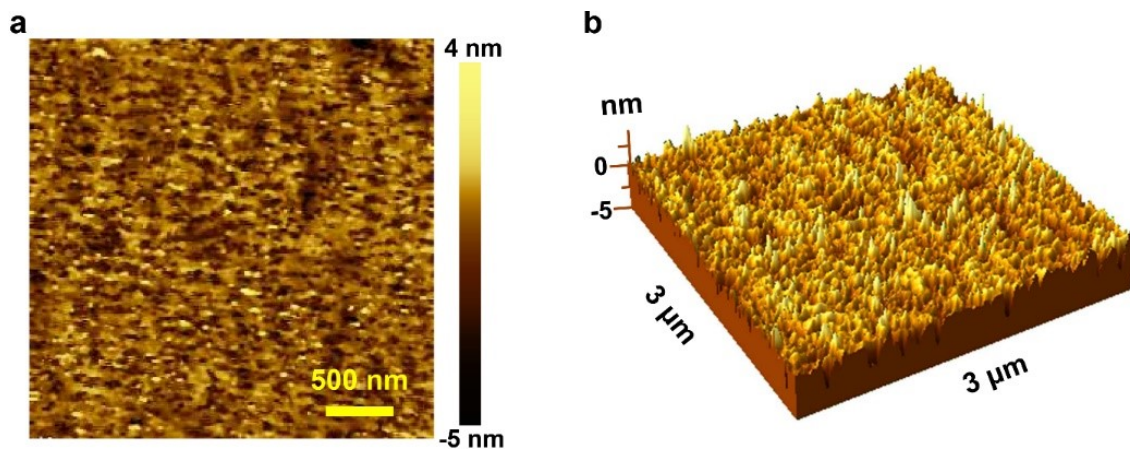

**Fig. S8.** AFM images of Cs<sub>3</sub>Cu<sub>2</sub>I<sub>5</sub> microplatelet on mica substrate.

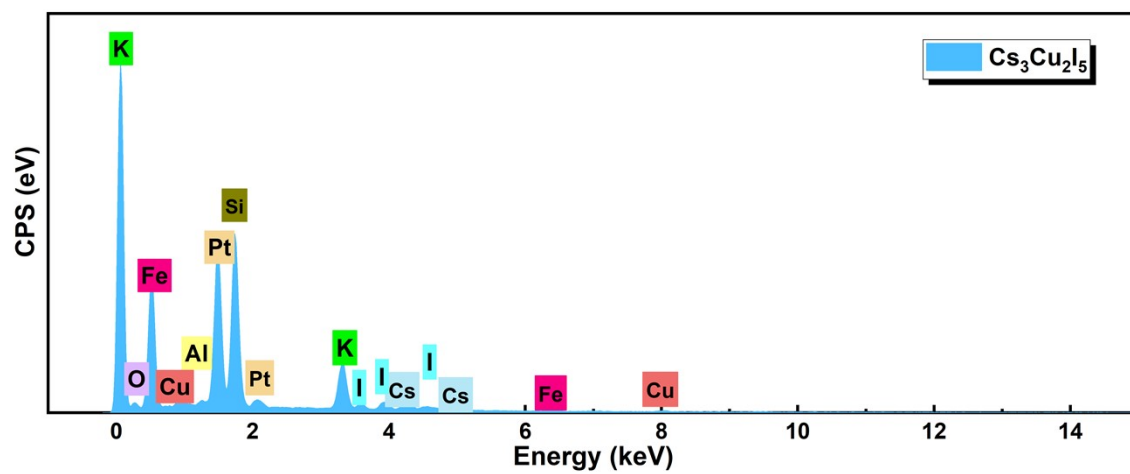

**Fig. S9.** EDS spectrum of the  $\text{Cs}_3\text{Cu}_2\text{I}_5$  microplatelets.

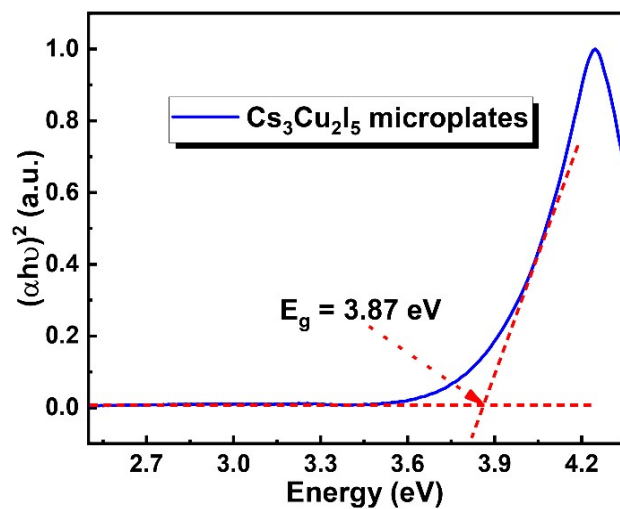

**Fig. S10.** Tauc curve of the Cs<sub>3</sub>Cu<sub>2</sub>I<sub>5</sub> microplatelets corresponding to the absorption spectrum.

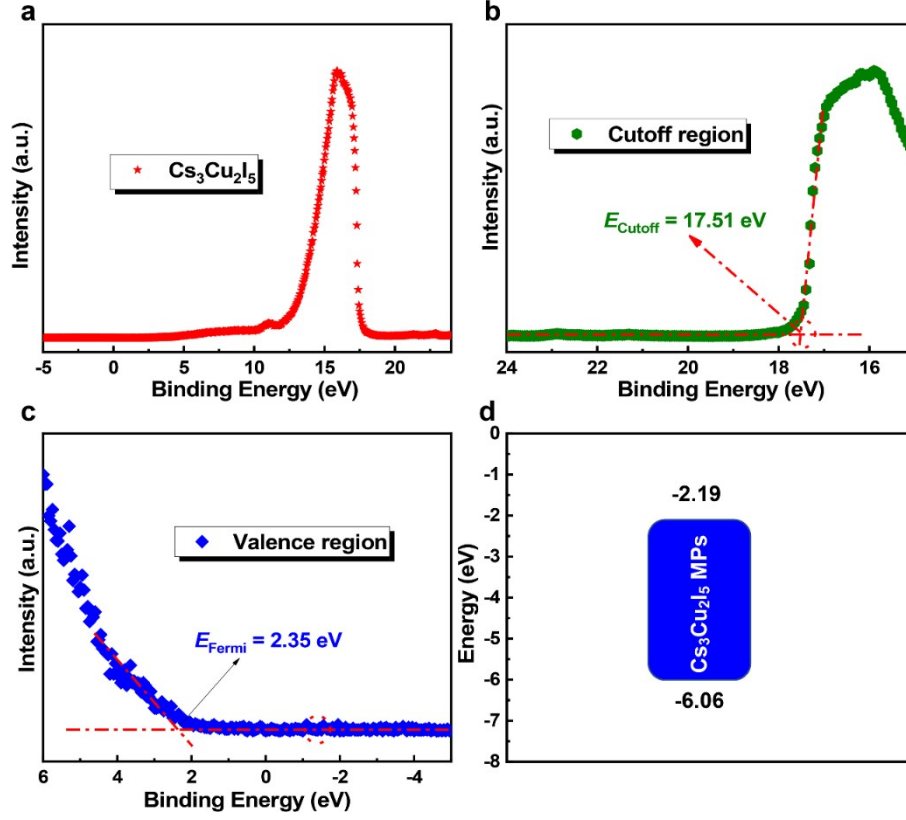

**Fig. S11.** UPS data of the Cs<sub>3</sub>Cu<sub>2</sub>I<sub>5</sub> microplatelets.

By means of the UV electronic energy spectrum (UPS), the  $E_{\text{Cutoff}}$  of the Cs<sub>3</sub>Cu<sub>2</sub>I<sub>5</sub> microplatelets is calculated as 17.51 eV and  $E_{\text{Fermi}}$  is 2.35 eV, and the formula is as follows:

$$E_{\text{VBM}} = h\nu - E_{\text{Cutoff}} + E_{\text{Fermi}} \quad (1)$$

$$E_{\text{CBM}} = E_{\text{VBM}} + E_{\text{g}} \quad (2)$$

where,  $E_{\text{Cutoff}}$  is the binding energy of the secondary cutoff in the spectrum,  $E_{\text{Fermi}}$  is the difference between the valence band and Fermi energy level, and  $h\nu$  is the energy of a photon,  $E_{\text{VBM}}$  is the maximum price band,  $E_{\text{CBM}}$  is the minimum value of conduction band,  $E_{\text{g}}$  is the optical band gap of Cs<sub>3</sub>Cu<sub>2</sub>I<sub>5</sub>. After detailed calculation, the  $E_{\text{VBM}}$  and  $E_{\text{CBM}}$  of Cs<sub>3</sub>Cu<sub>2</sub>I<sub>5</sub> is 6.06 eV and 2.19 eV, respectively.

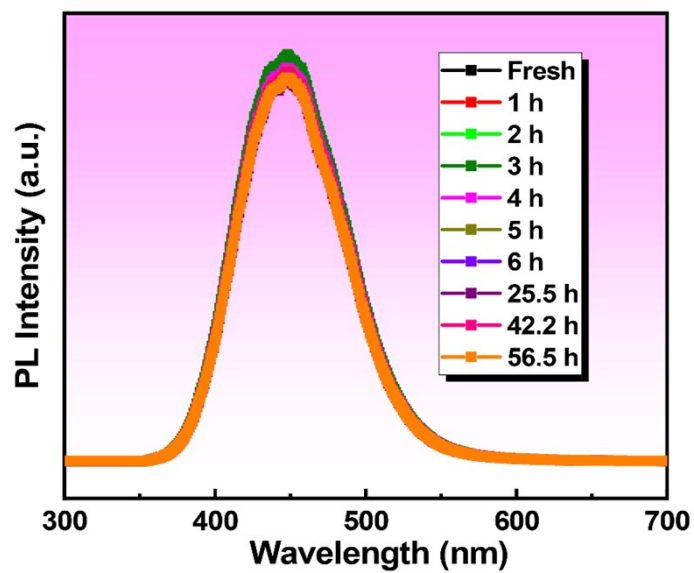

**Fig. S12.** Evolution of the PL spectra of the  $\text{Cs}_3\text{Cu}_2\text{I}_5$  microplatelet recorded under continuous UV light excitation (265 nm,  $3.4 \text{ mW/cm}^2$ ) in air ambient condition.

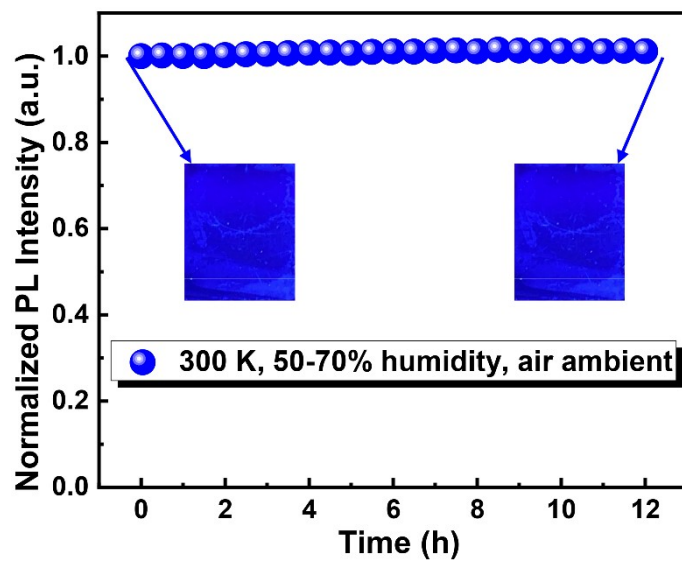

**Fig. S13.** Evolution of the PL intensity of the  $\text{Cs}_3\text{Cu}_2\text{I}_5$  microplatelets over a continuous test for

12

h.

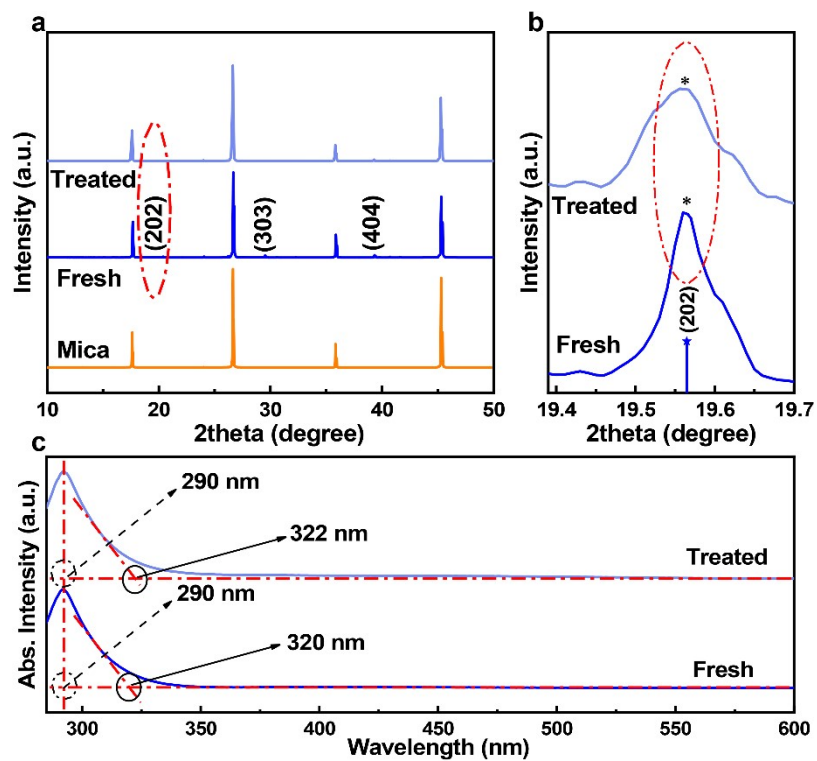

**Fig. S14.** Comparison on (a, b) the XRD patterns, and (c) UV-visible absorption spectra of the  $\text{Cs}_3\text{Cu}_2\text{I}_5$  MPs before and after humidity treatment in high humidity (90–95%) condition for 60 min.

**Table S1.** Fitting parameters of the PL decay curves for the Cs<sub>3</sub>Cu<sub>2</sub>I<sub>5</sub> microplatelets grown at different temperatures.

| Growth temperature | $\tau_{\text{ave.}}$ (ns) | $\tau_1$ (ns) | $\tau_2$ (ns) | Percent ( $\tau_1$ ) | Percent ( $\tau_2$ ) | R <sup>2</sup> |
|--------------------|---------------------------|---------------|---------------|----------------------|----------------------|----------------|
| 450 °C             | 1012 ns                   | 122.5 ns      | 1034.2 ns     | 17.2 %               | 82.8 %               | 0.999          |
| 490 °C             | 1072 ns                   | 154.7 ns      | 1092.7 ns     | 13.5 %               | 86.5 %               | 0.999          |
| 520 °C             | 921 ns                    | 104.8 ns      | 1081.0 ns     | 67.0 %               | 33.0 %               | 0.992          |



**Table S2.** Element compositions of the Cs<sub>3</sub>Cu<sub>2</sub>I<sub>5</sub> microplatelets with different morphologies.

| Cs <sub>3</sub> Cu <sub>2</sub> I <sub>5</sub><br>microplatelets | Element | Weight (%) | Atomic (%) |
|------------------------------------------------------------------|---------|------------|------------|
| 3a-I                                                             | Cu K    | 2.35       | 0.93       |
|                                                                  | I L     | 11.32      | 2.26       |
|                                                                  | Cs L    | 6.43       | 1.22       |
| 3a-II                                                            | Cu K    | 1.61       | 0.59       |
|                                                                  | I L     | 7.15       | 1.32       |
|                                                                  | Cs L    | 3.74       | 0.66       |
| 3a-III                                                           | Cu K    | 3.24       | 1.40       |
|                                                                  | I L     | 14.6       | 3.16       |
|                                                                  | Cs L    | 8.41       | 1.73       |
| 3a-IV                                                            | Cu K    | 3.15       | 1.34       |
|                                                                  | I L     | 14.39      | 3.07       |
|                                                                  | Cs L    | 7.88       | 1.60       |

**Table S3.** Element compositions of the Cs<sub>3</sub>Cu<sub>2</sub>I<sub>5</sub> microplatelet.

| Element | Weight (%) | Atomic (%) |
|---------|------------|------------|
| Cu K    | 0.59       | 0.20       |
| I L     | 3.48       | 0.58       |
| Cs L    | 1.85       | 0.30       |
